# Supplementary material for: Chemosensory-Related Genes in Marine Copepods
Source: MDPI journal article supplement (doi:10.3390/md20110681), 2022-10-29
Supplement: s1 [file s1]

**Table S1:** Summary of transcripts encoding for chemosensory genes identified in several copepods. The list includes ionotropic receptors (IRs), gustatory receptors (GRs), chemosensory proteins (CSPs). IR number includes the different classes (IR8a, IR21a, IR25a, IR76b, IR93a, IRCS2) including only transcripts that passed the reciprocal BLAST step and showed the predicted Pfam domain.

|                         |                   | Ionotropic receptors (IR) |       |       |       |       |       | CSP | GR |
|-------------------------|-------------------|---------------------------|-------|-------|-------|-------|-------|-----|----|
|                         |                   | IR8a                      | IR21a | IR25a | IR76b | IR93a | IRCS2 |     |    |
| <i>A. tonsa</i>         | Acartiidae        | 1                         | 1     | 1     | 0     | 0     | 5     | 1   | 0  |
| <i>C. finmarchicus</i>  | Calanidae         | 1                         | 1     | 0     | 0     | 1     | 3     | 1   | 0  |
| <i>C. glacialis</i>     | Calanidae         | 2                         | 1     | 2     | 0     | 1     | 0     | 0   | 0  |
| <i>C. helgolandicus</i> | Calanidae         | 1                         | 0     | 1     | 0     | 1     | 0     | 1   | 0  |
| <i>C. hyperboreus</i>   | Calanidae         | 1                         | 0     | 0     | 0     | 1     | 1     | 0   | 0  |
| <i>C. marshallae</i>    | Calanidae         | 1                         | 0     | 1     | 0     | 4     | 1     | 0   | 0  |
| <i>C. propinquus</i>    | Calanidae         | 1                         | 0     | 1     | 0     | 1     | 0     | 1   | 0  |
| <i>L. madurae</i>       | Pontellidae       | 1                         | 1     | 1     | 0     | 1     | 1     | 0   | 0  |
| <i>N. cristatus</i>     | Calanidae         | 0                         | 0     | 1     | 0     | 1     | 2     | 1   | 0  |
| <i>N. flemingeri</i>    | Calanidae         | 0                         | 0     | 1     | 0     | 2     | 1     | 1   | 0  |
| <i>N. plumchrus</i>     | Calanidae         | 0                         | 0     | 1     | 0     | 0     | 2     | 1   | 0  |
| <i>P. annandalei</i>    | Pseudodiaptomidae | 0                         | 1     | 1     | 0     | 0     | 0     | 1   | 0  |
| <i>R. gigas</i>         | Rhincalanidae     | 0                         | 2     | 5     | 0     | 1     | 2     | 0   | 0  |
| <i>T. longicornis</i>   | Temoridae         | 3                         | 0     | 3     | 0     | 3     | 1     | 2   | 9  |
| <i>T. stylifera</i>     | Temoridae         | 0                         | 0     | 1     | 0     | 0     | 0     | 0   | 0  |
| <i>A. royi</i>          | Cyclopidae        | 2                         | 0     | 1     | 0     | 0     | 0     | 0   | 0  |
| <i>P. nana</i>          | Cyclopoida        | 4                         | 0     | 1     | 0     | 0     | 1     | 0   | 0  |
| <i>T. japonicus</i>     | Harpacticidae     | 2                         | 1     | 1     | 1     | 0     | 3     | 0   | 0  |
