# Supplementary figures and images for: Chemosensory-Related Genes in Marine Copepods
Source: MDPI journal article supplement (doi:10.3390/md20110681), 2022-10-29

A

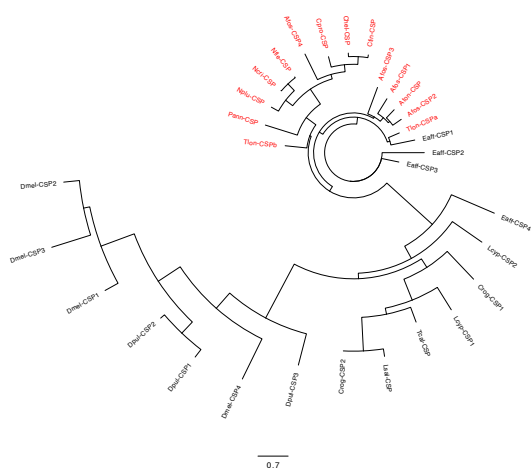

B

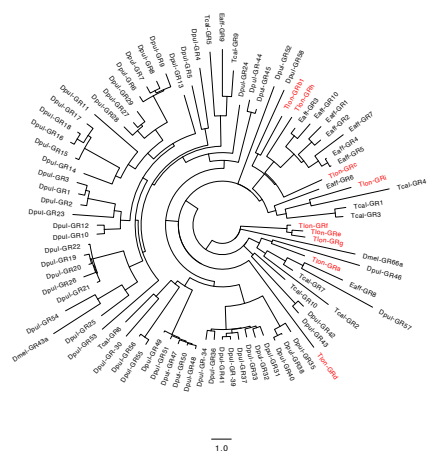

Supplement: s1 [file s1]
